# Supplementary material
Source: PubMed Central journal article supplement (PMC10481664)
Supplement: EMBR-24-e56230-s012.pdf [file EMBR-24-e56230-s012.pdf]

## Expanded View Figures

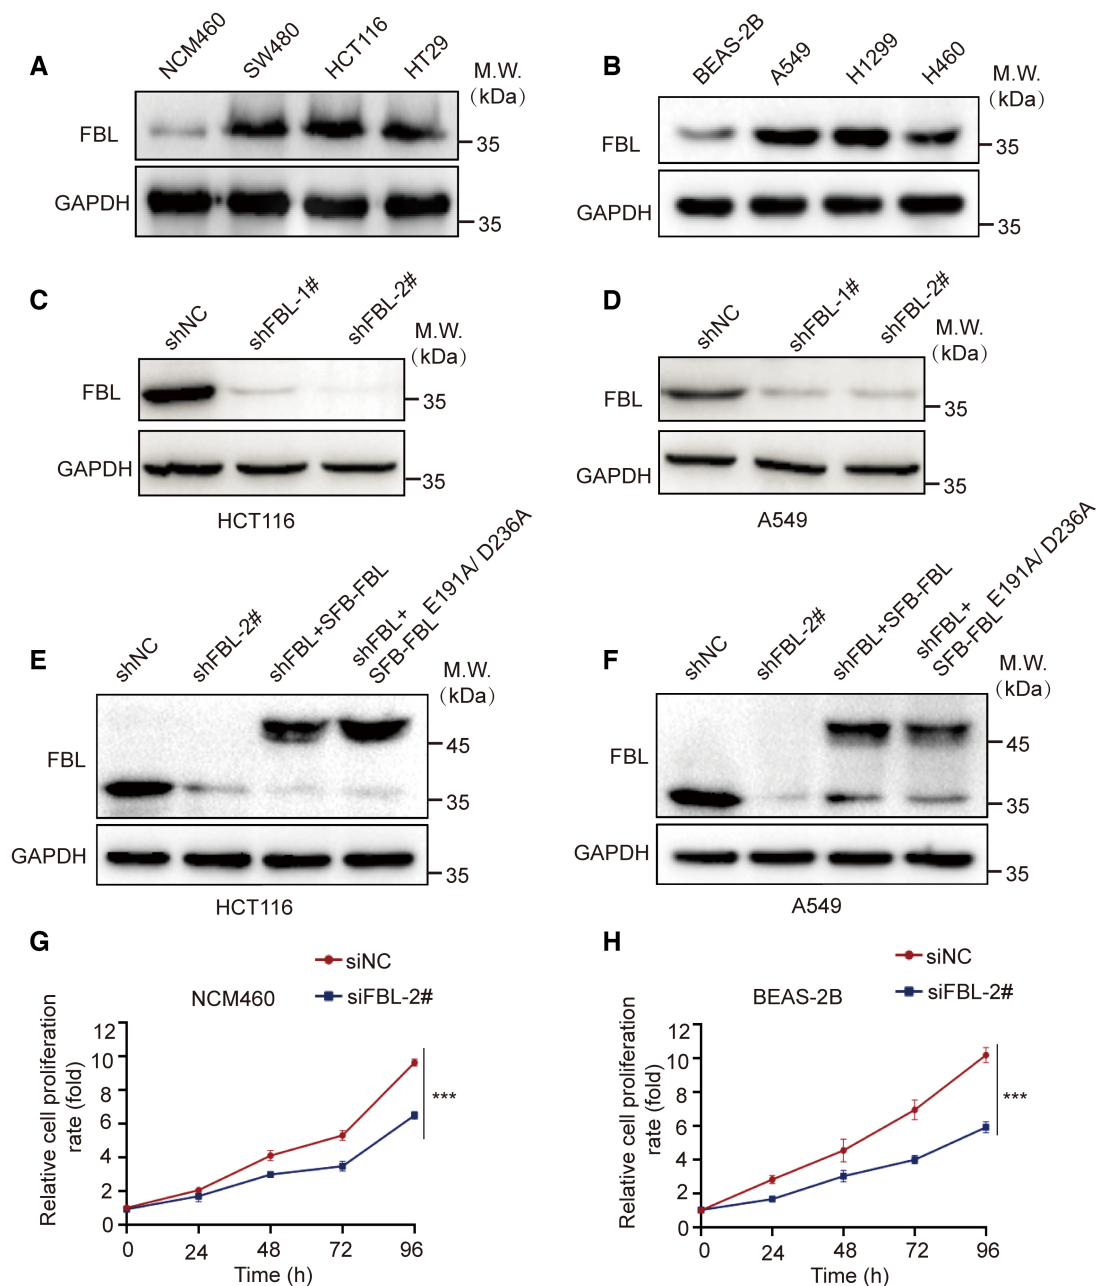

**Figure EV1. FBL is overexpressed in cancer cell lines and promotes cell proliferation.**

A, B Western blotting analyses of FBL expression in colon/lung cancer and normal cell lines.

C, D Cell lysates of monoclonal cell lines were immunoblotted with FBL antibodies to confirm the knockdown efficiency in HCT116/A549 cells.

E, F Cells were reconstituted with full-length FBL and FBL<sup>E191A/D236A</sup> in HCT116/A549 cells. Protein expressions were examined by western blot with indicated antibodies.

G, H Cell viability assays were performed on control (siNC) and FBL knockdown (siFBL) NCM460/BEAS-2B cells using CCK-8 assays. The data are presented as mean  $\pm$  SD from three independent experiments. The statistical significance was determined using Student's *t*-test. \*\*\**P* < 0.001.

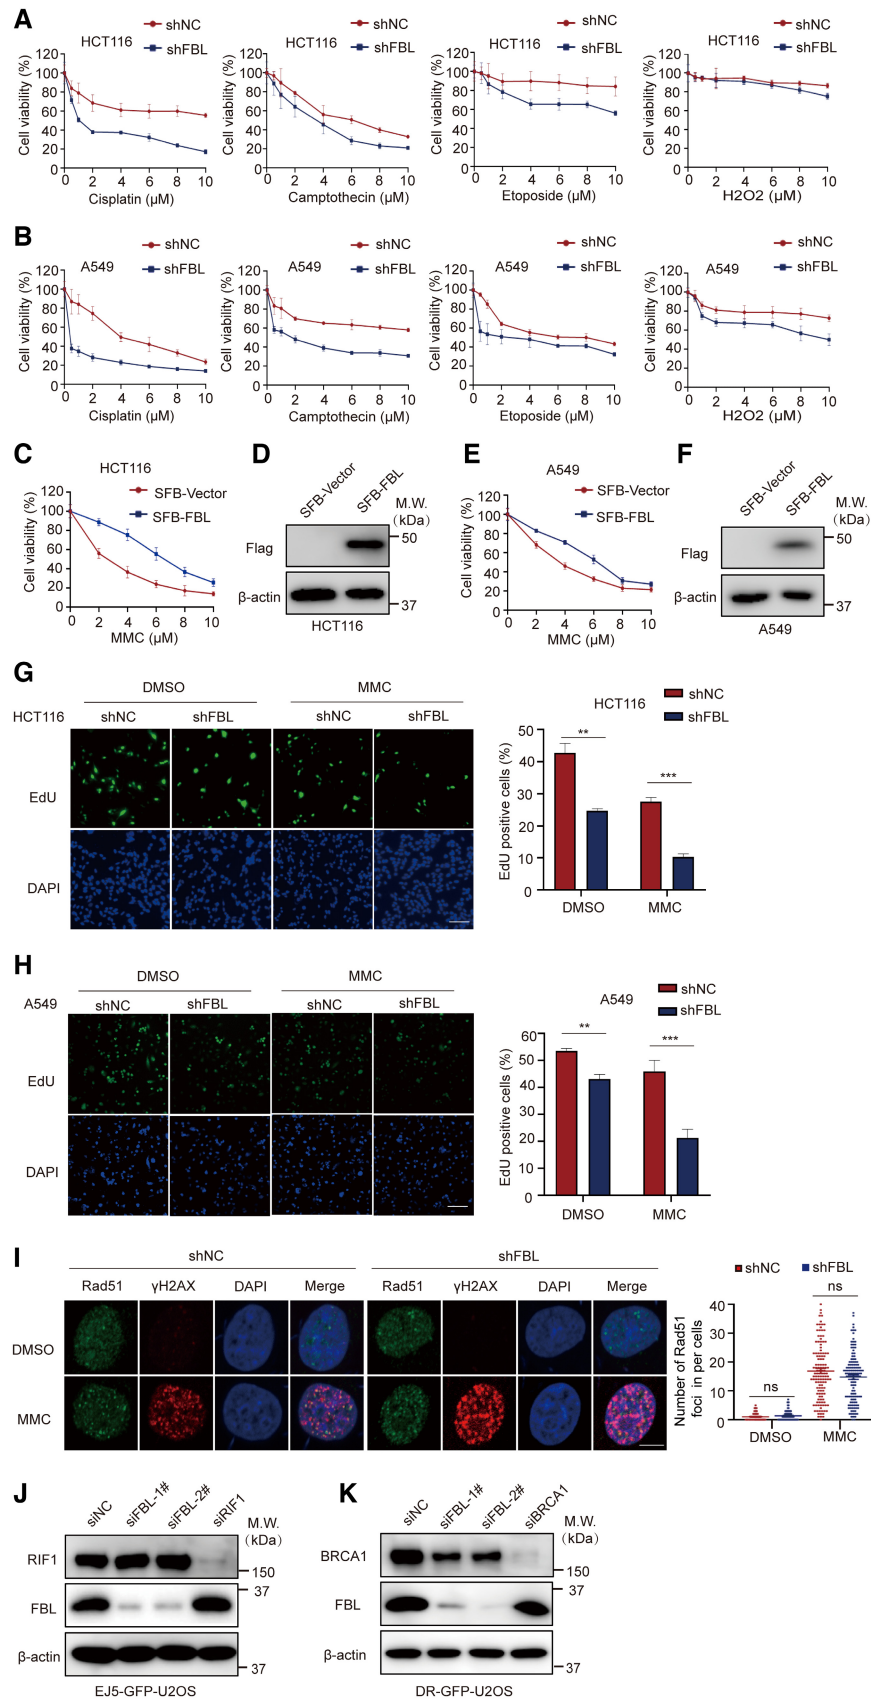

**Figure EV2. FBL plays a crucial role in regulating cell sensitivity to DNA damage and HR-mediated DNA repair.**

A, B Cell viability analysis was performed on control (shNC) and shFBL-HCT116/shFBL-A549 cells treated with indicated concentrations of cisplatin, etoposide, camptothecin, or  $H_2O_2$  using CCK-8 assays. Each data point represents the mean  $\pm$  SD from three replicates.

C–F (C, E) FBL overexpression cells are sensitive to MMC. FBL WT or empty vector HCT116/A549 cells were treated with MMC. Cell survival was measured by CCK-8 assay. Each data point represents the mean  $\pm$  SD from three replicates. (D, F) Cells were reconstituted with full-length FBL in HCT116/A549 cells. Protein expressions were examined by western blot with indicated antibodies.

G, H Immunofluorescence analysis of 5-ethynyl,2'-deoxyuridine (EdU) incorporation and quantitative analysis of EdU-positive cells with 5  $\mu$ M MMC or DMSO treatment. Scale bar, 50  $\mu$ m. The bar graphs present data as mean  $\pm$  SD from three independent experiments. The statistical significance was determined using one-way ANOVA. \*\* $P < 0.01$  and \*\*\* $P < 0.001$ .

I Immunofluorescence staining showed the formation of  $\gamma$ H2AX and Rad51 foci in shFBL and shNC HCT116 cells treated with 5  $\mu$ M MMC or mock treatment. The scale bar represents 10  $\mu$ m. The right panel displays quantification of the left panel: indicating the number of Rad51 foci per cell ( $n \geq 100$  cells). The bar graphs present data as mean  $\pm$  SD from three independent experiments. The statistical significance was determined using one-way ANOVA. ns, no significance.

J, K Western blotting analysis of FBL levels in FBL knockdown EJ5-GFP-U2OS/DR-GFP-U2OS cells.

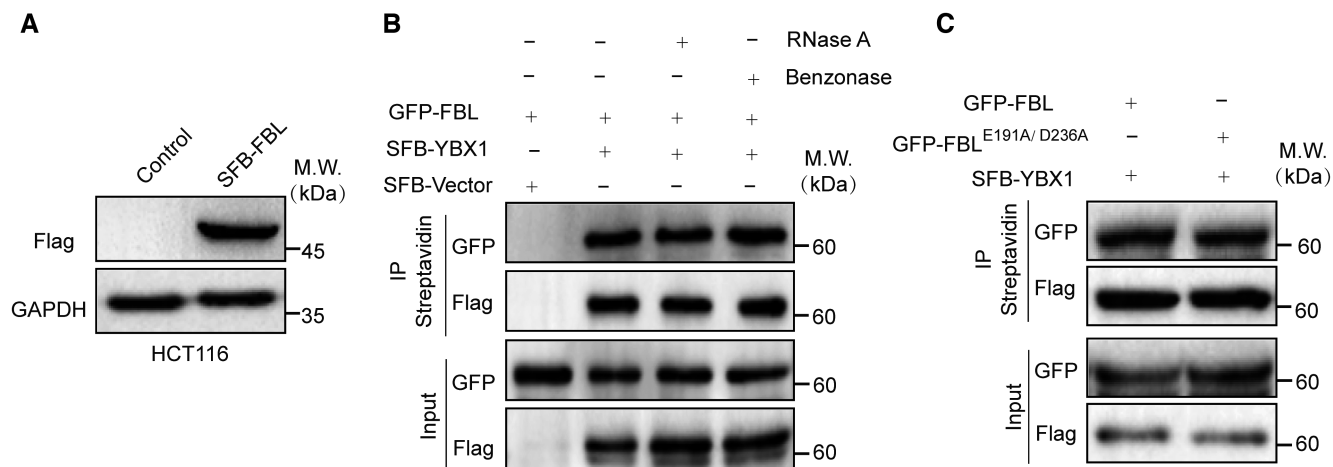

**Figure EV3. FBL interacts with YBX1 independent of DNA or RNA and its methyltransferase activity.**

- A To establish cell lines stably expressing epitope-tagged proteins, HCT116 cells were transfected with plasmids encoding SFB-FBL. Protein expressions were examined by western blotting with indicated antibodies.
- B The interaction between FBL and YBX1 is not mediated by DNA or RNA. The association between FBL and YBX1 was examined by coimmunoprecipitation assays in HCT116 cells with RNase A or benzonase treatment.
- C The catalytically inactive mutant of FBL also binds YBX1 *in vivo*. Co-IP analyses of GFP-FBLE191A/D236A and SFB-YBX1 in HCT116 cells.

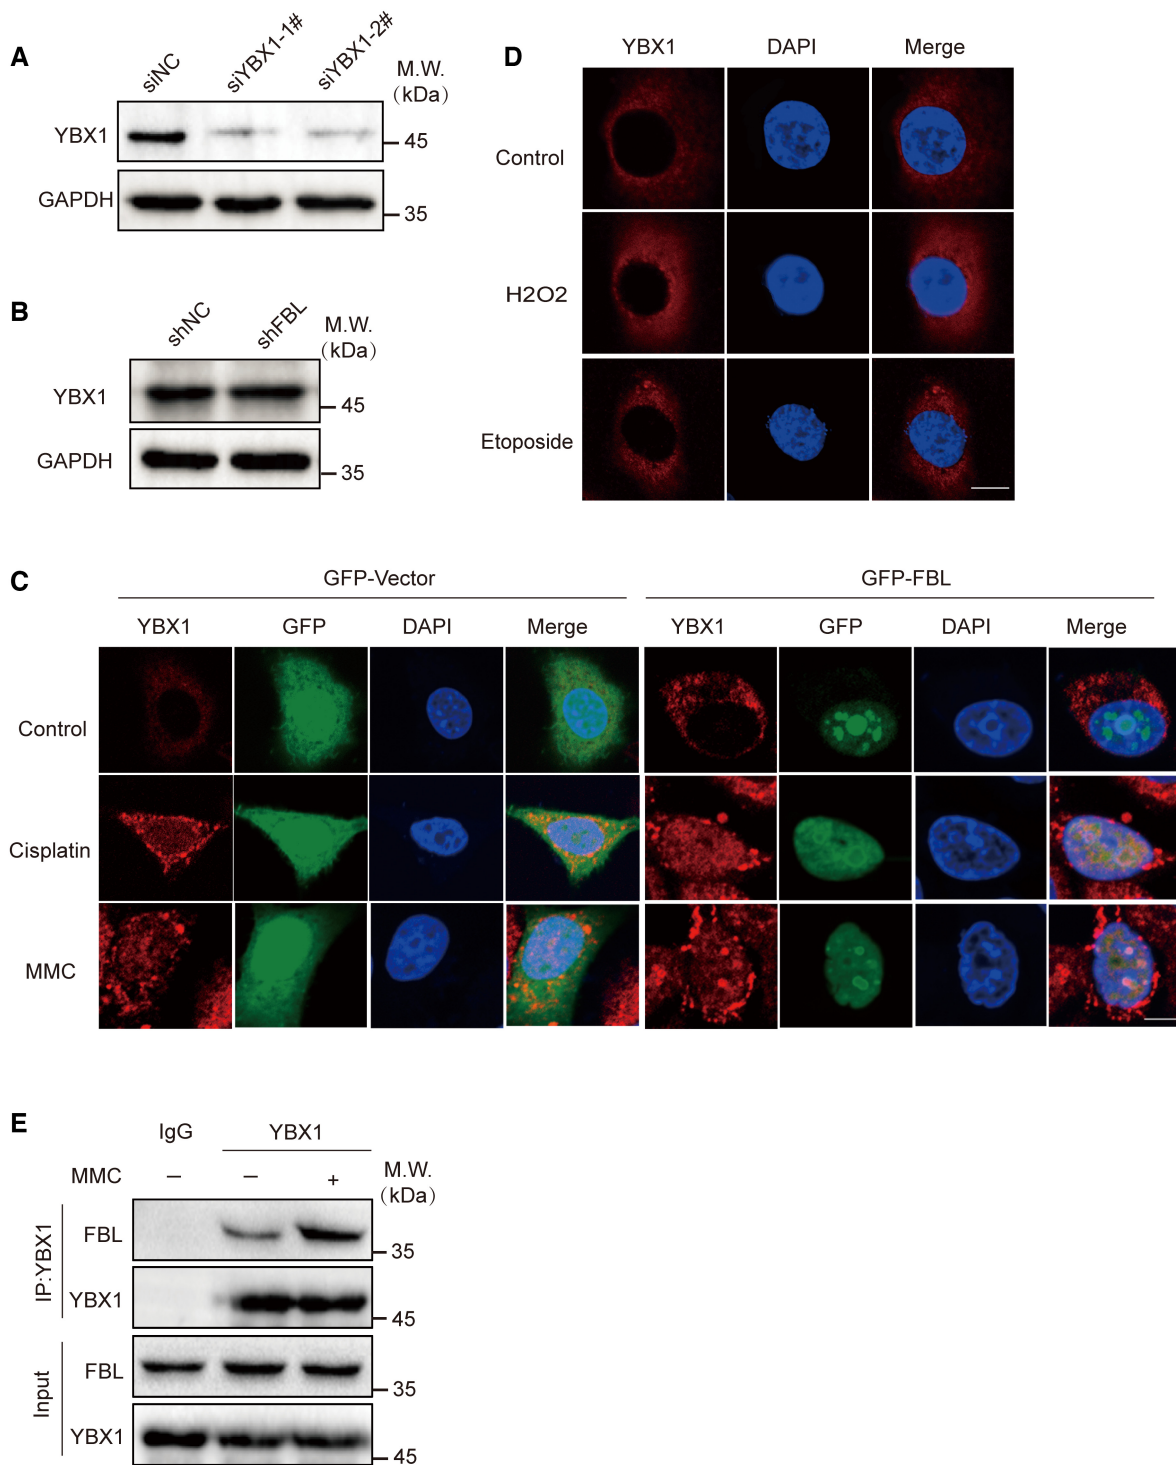

**Figure EV4. The effects of FBL on the expression/subcellular localization of YBX1 and the increased interaction between YBX1 and FBL induced by MMC.**

A Western blotting analysis of YBX1 levels in YBX1-knockdown HCT116 cells. GAPDH was used as the protein-loading control.

B Western blotting analysis of total YBX1 proteins in FBL KD (shFBL) HCT116 cells. GAPDH was used as the protein-loading control.

C Subcellular localization of YBX1/FBL was confirmed by immunofluorescence assay after MMC (5  $\mu$ M, overnight) or cisplatin (25  $\mu$ M, 2 h) treatment in FBL WT or empty vector cells. Scale bar, 10  $\mu$ m.

D Subcellular localization of YBX1 was confirmed by immunofluorescence assay after H<sub>2</sub>O<sub>2</sub> (2 mM, 5 min)/etoposide (10  $\mu$ M, 6 h) treatment. Scale bar, 10  $\mu$ m.

E The endogenous association between FBL and YBX1 in HCT116 cells was examined by coimmunoprecipitation assays with 5  $\mu$ M MMC treatment. Cells were lysed with NETN300 buffer, and nuclear lysates were examined by IP and western blot with indicated antibodies.

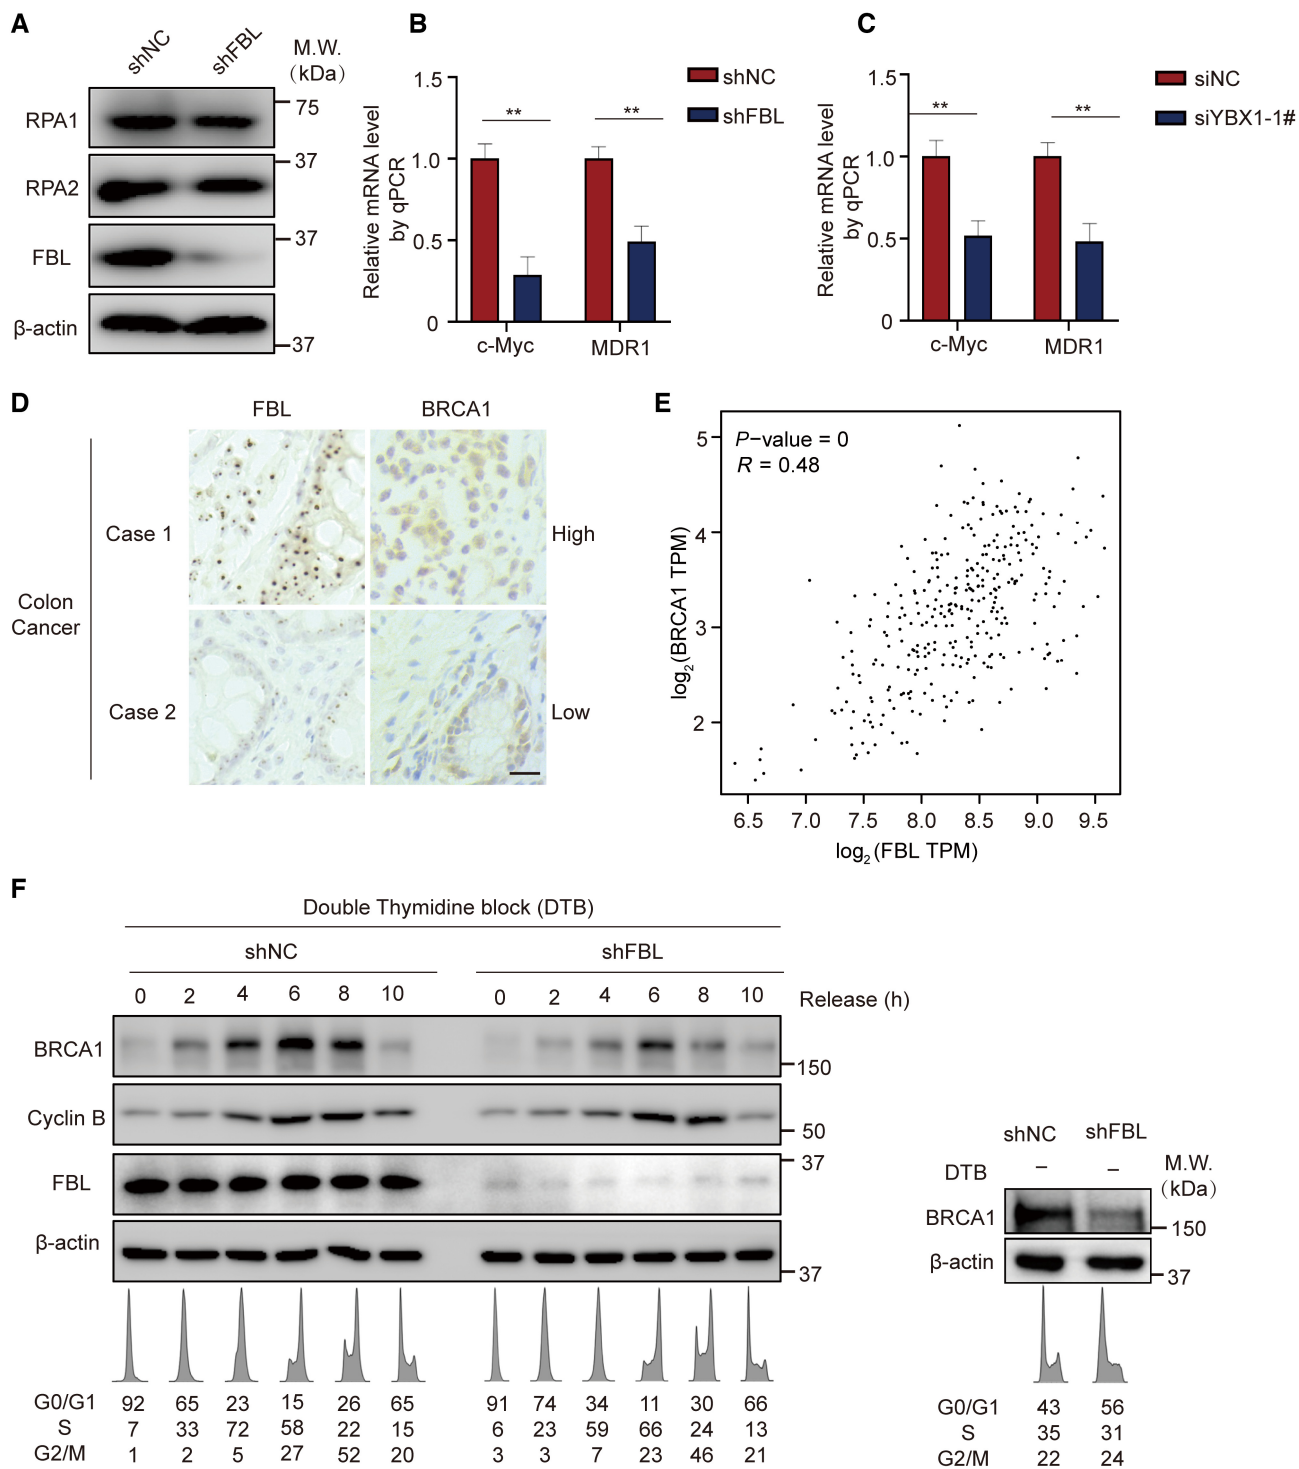

Figure EV5.

**Figure EV5. Effects of FBL or YBX1 on other genes expression and the impact of FBL on the cell cycle process.**

- A Western blotting analysis of RPA1 and RPA2 proteins in FBL KD (shFBL) HCT116 cells.  $\beta$ -actin was used as the protein-loading control.
- B, C The mRNA levels of *c-Myc* or *MDR1* were validated by RT-qPCR after FBL or YBX1 silencing in HCT116 cells. Ct values were normalized to GAPDH. A mean value  $\pm$  SD of three independent experiments is shown. Student's *t*-test.  $**P < 0.01$ .
- D The correlation of FBL and BRCA1 gene expressions. Representative images of immunohistochemical analysis of FBL and BRCA1 expressions in 40 human colon tumors. Scale bar, 25  $\mu$ m.
- E The correlation analysis of FBL and BRCA1 gene expressions obtained from GEPIA database (<http://gepia.cancer-pku.cn/>). TPM stands for transcripts per million; R stands for correlation coefficient. Each spot indicates FBL and BRCA1 expression in a specific sample.
- F The levels of BRCA1 protein fluctuate during cell cycle progression, with its expression being regulated by FBL. HCT116 cells and shFBL-HCT116 cells were grown asynchronously (right panel) or were synchronized at the G1/S transition by a double thymidine block (DTB) and then released by addition of fresh medium (left panel). At various time points post-release, cell extracts were prepared and analyzed by western blotting using indicated antibodies. Cyclin B serves as a marker of S, G2, and M phases. Similarly, cells induced at specific time points were subjected to flow cytometry analysis. The resulting flow cytometry profiles and the cell cycle distributions are listed below the immunoblots.  $\beta$ -actin was used as the protein-loading control.
